# Supplementary material for: Detection of SARS-CoV-2 intra-host recombination during superinfection with Alpha and Epsilon variants in New York City
Source: PubMed Central journal article supplement (PMC9233664; doi:10.1038/s41467-022-31247-x), 2022-06-25
Supplement: 41467_2022_31247_MOESM1_ESM.pdf [file 41467_2022_31247_MOESM1_ESM.pdf]

**SUPPLEMENTARY INFORMATION:**

Detection of SARS-CoV-2 intra-host recombination during superinfection with Alpha and Epsilon variants in New York City

J. Wertheim et al.

**Supplementary Table 1. Recombinant haplotype frequencies across separate extractions, reverse transcription, and PCR amplification in high-throughput sequencing for 947 nt S gene fragment, nucleotide positions 23604 and 23709.**

| Haplotypes   |          |          | Count (frequencies) |                 |                 |                 |
|--------------|----------|----------|---------------------|-----------------|-----------------|-----------------|
| Type         | 23604    | 23709    | NYCPHL-002461-A     | NYCPHL-002461-B | NYCPHL-002461-C | NYCPHL-002461-D |
| <b>MAJOR</b> | <b>A</b> | <b>T</b> | 3633 (78.57%)       | 4095 (76.43%)   | 3778 (76.40%)   | 4745 (78.24%)   |
| <b>MINOR</b> | <b>C</b> | <b>C</b> | 634 (13.71%)        | 776 (14.48%)    | 762 (15.41%)    | 851 (14.03%)    |
| <b>MIX</b>   | <b>A</b> | <b>C</b> | 162 (3.50%)         | 234 (4.37%)     | 191 (3.86%)     | 237 (3.91%)     |
| <b>MIX</b>   | <b>C</b> | <b>T</b> | 195 (4.22%)         | 253 (4.72%)     | 214 (4.33%)     | 232 (3.83%)     |
| <b>Depth</b> |          |          | 4624 (100%)         | 5358 (100%)     | 4945 (100%)     | 6065 (100%)     |

**Supplementary Table 2. Recombinant haplotype frequencies across separate extractions, reverse transcription, and PCR amplification in high-throughput sequencing for the 476 nt ORF8 fragment, nucleotide positions 27972, 28048, 28095, 28111.**

| Haplotypes   |       |       |       |       | Count (frequencies) |                 |                 |                 |
|--------------|-------|-------|-------|-------|---------------------|-----------------|-----------------|-----------------|
| Type         | 27972 | 28048 | 28095 | 28111 | NYCPHL-002461-A     | NYCPHL-002461-B | NYCPHL-002461-C | NYCPHL-002461-D |
| <b>MAJOR</b> | T     | T     | T     | G     | 1382 (70.22%)       | 1164 (69.83%)   | 1110 (68.90%)   | 1873 (70.26%)   |
| <b>MINOR</b> | C     | G     | A     | A     | 381 (19.36%)        | 305 (18.30%)    | 347 (21.54%)    | 505 (18.94%)    |
| <b>MIX</b>   | T     | G     | A     | A     | 57 (2.90%)          | 40 (2.40%)      | 31 (1.92%)      | 77 (2.89%)      |
| <b>MIX</b>   | C     | T     | T     | G     | 50 (2.54%)          | 60 (3.60%)      | 55 (3.41%)      | 66 (2.48%)      |
| <b>MIX</b>   | T     | T     | A     | A     | 40 (2.03%)          | 43 (2.58%)      | 28 (1.74%)      | 48 (1.80%)      |
| <b>MIX</b>   | C     | G     | T     | G     | 34 (1.73%)          | 28 (1.68%)      | 18 (1.12%)      | 45 (1.69%)      |
| <b>MIX</b>   | T     | T     | T     | A     | 8 (0.41%)           | 7 (0.42%)       | 6 (0.37%)       | 12 (0.45%)      |
| <b>MIX</b>   | C     | G     | A     | G     | 4 (0.20%)           | 6 (0.36%)       | 4 (0.25%)       | 12 (0.45%)      |
| <b>MIX</b>   | T     | G     | T     | G     | 6 (0.30%)           | 8 (0.48%)       | 7 (0.43%)       | 15 (0.56%)      |
| <b>MIX</b>   | C     | T     | A     | A     | 1 (0.05%)           | 3 (0.18%)       | 3 (0.19%)       | 5 (0.19%)       |
| <b>MIX</b>   | C     | G     | T     | A     | 1 (0.05%)           | 1 (0.06%)       | NULL            | NULL            |
| <b>MIX</b>   | T     | T     | A     | G     | 1 (0.05%)           | 1 (0.06%)       | 2 (0.12%)       | 7 (0.26%)       |
| <b>MIX</b>   | C     | T     | A     | G     | 1 (0.05%)           | 1 (0.06%)       | NULL            | NULL            |
| <b>MIX</b>   | T     | G     | T     | A     | 1 (0.05%)           | NULL            | NULL            | NULL            |
| <b>MIX</b>   | C     | T     | T     | A     | 1 (0.05%)           | NULL            | NULL            | 1 (0.04%)       |
| <b>Depth</b> |       |       |       |       | 1968 (100%)         | 1667 (100%)     | 1611 (100%)     | 2666 (100%)     |

(A) Index case

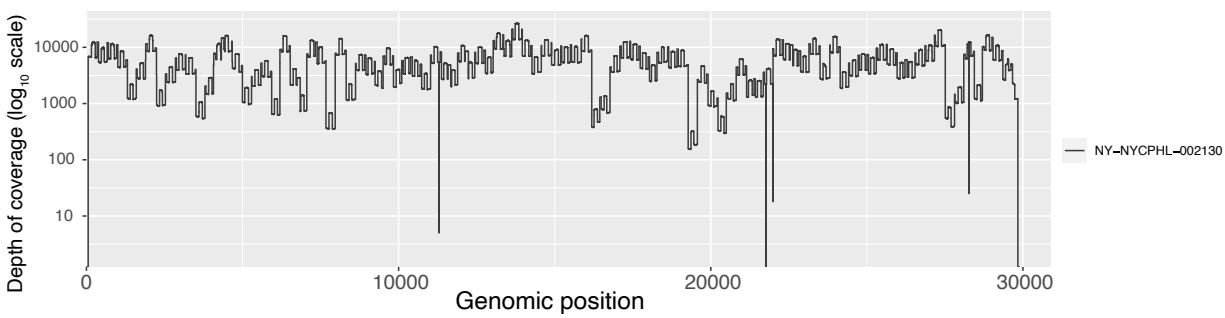

(B) Named contact partner

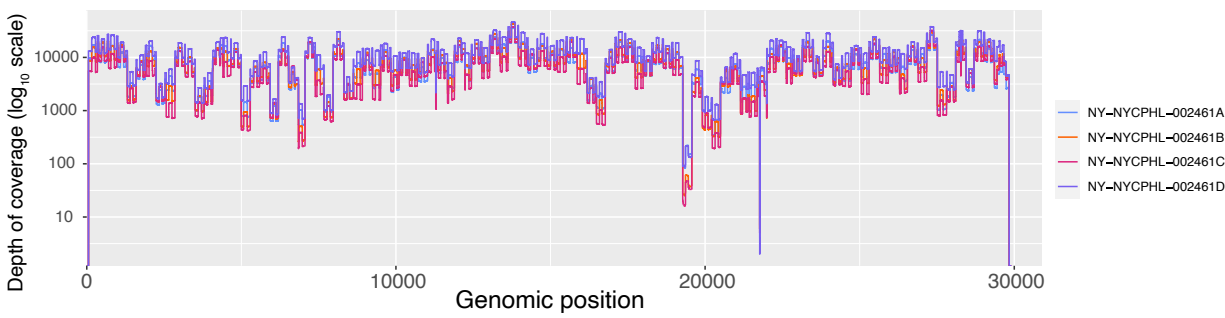

**Supplementary Figure 1. Genomic sequencing depth in the (A) index case NY-NYCPHL-002130 and (B) named contact partner NY-NYCPHL-002461.**
